# Supplementary material
Source: Springer Nature journal article supplement (https://www.springermedizin.de/resource/supplementary/12885_2010_2496_MOESM7_ESM.pdf/9461976)

Figure 6

**A**

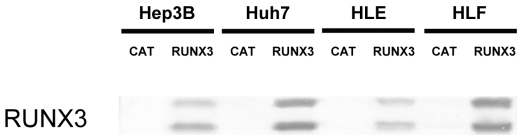

**B**

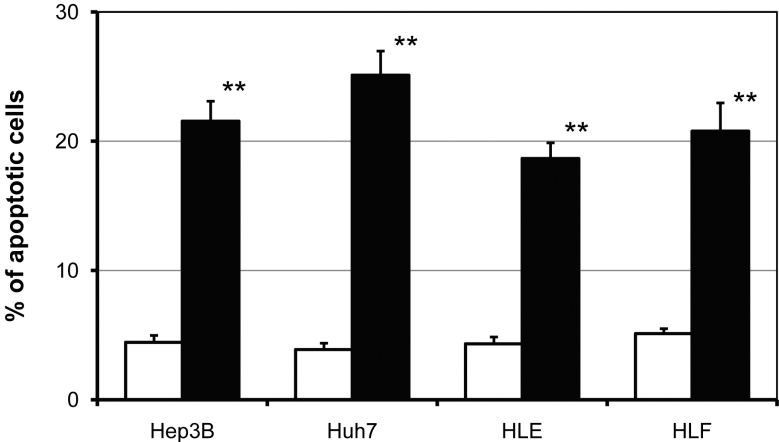

**C**

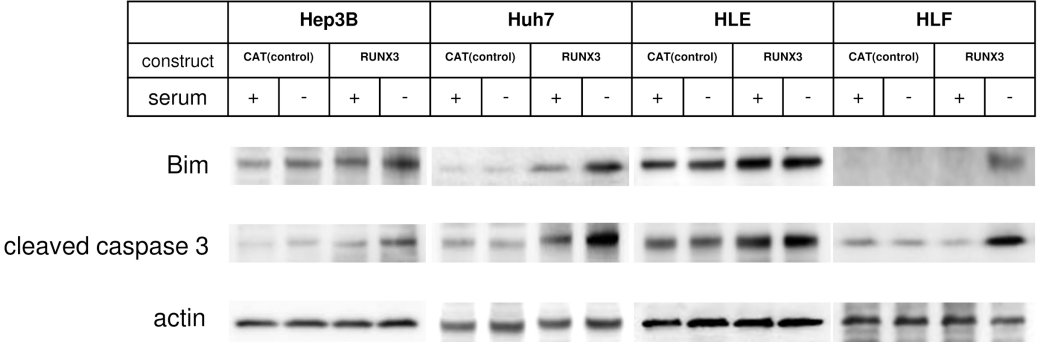

Supplement: MOESM7 [file 9461976]
